# Supplementary material for: COVID-19 Related Traumatic Distress in Psychotherapy Patients during the Pandemic: The Role of Attachment, Working Alliance, and Therapeutic Agency
Source: MDPI journal article supplement (doi:10.3390/brainsci11101288), 2021-09-28
Supplement: s1 [file s1]

## Supplement

### Non-significant Covariates

The Chi-Square test was used to examine whether COVID-related distress differs across patients with different gender or education. Pearson correlations were used to examine whether age was related with COVID-related distress. One-Way ANOVA was used to examine the difference in traumatic stress across time of completion. The results indicated that neither gender or education was related to COVID-related distress (Gender: Chi-Square = 44.55,  $df = 48$ ,  $p = .62$  for baseline; Chi-Square = 53.29,  $df = 44$ ,  $p = .16$  for follow-up; Education: Chi-Square = 126.93,  $df = 144$ ,  $p = .84$  for baseline; Chi-Square = 119.33,  $df = 110$ ,  $p = .26$  for follow-up). Age was not related to traumatic distress either ( $r = .002$ ,  $p = .97$  for baseline;  $r = -.04$ ,  $p = .71$  for follow-up). The COVID-related traumatic distress did not significantly differ depending on the month of completion of the follow-up survey,  $F(3,117) = 1.75$ ,  $p = .16$ .

### Non-significant Moderation results

**Table S1.** Non-significant Moderation Results on COVID-related Distress at Follow-up.

| Moderation                       | Coefficient | SE  | <i>t</i> | <i>p</i> |
|----------------------------------|-------------|-----|----------|----------|
| <b>ECR-RS Avoidance X WAI-SR</b> |             |     |          |          |
| ECR-RS Avoidance                 | -.02        | .09 | -.25     | .81      |
| WAI-SR                           | -.09        | .08 | -1.07    | .29      |
| Moderation: Avoidance X Alliance | .06         | .07 | .88      | .39      |
| Covariate: time of completion    | .21         | .10 | 2.09     | .04*     |
| Covariate: IES_T0                | .64         | .08 | 8.53     | <.001*** |
| <b>ECR-RS Anxiety X TAI</b>      |             |     |          |          |
| ECR-RS Anxiety                   | .22         | .08 | 2.91     | .004**   |
| TAI                              | -.11        | .07 | -1.51    | .13      |
| Moderation: ECR-RS Anxiety X TAI | -.12        | .07 | 1.90     | .06      |
| Covariate: time of completion    | .19         | .10 | 1.95     | .05      |
| Covariate: IES_T0                | .63         | .07 | 8.80     | <.001*** |

*Notes.* The dependent variable is COVID-related traumatic distress at follow-up, as measured with the IES-RS. The covariates are COVID-related traumatic distress at baseline (IES-T0) and the time of completing baseline questionnaires. The significant moderations are reported in the main manuscript. ECR-RS = Experiences in Close Relationship questionnaire-Revised Short-form; TAI = Therapeutic Agency Inventory; WAI-SR = Working Alliance Inventory Short-form Revised; IES-R = Impact of Event Scale – Revised;

\* $p < .05$ ; \*\* $p < .01$ ; \*\*\* $p < .001$ .
